# Supplementary material for: Retrospective cohort study of COVID-19 in patients of the Brazilian public health system with SARS-COV-2 Omicron variant infection
Source: Research Square preprint supplement (doi:10.21203/rs.3.rs-1531296/v1), 2022-04-13
Supplement: Supplementary file 1 [file f124741ccb9c15bee77891d5.docx]

Supplementary Data

Table S1: Vaccination percentage of the Brazilian population stratified into three age groups

| Age | Vaccination schedule | | | | | |
| --- | --- | --- | --- | --- | --- | --- |
|  | Oct-Dec 2021 (%) | | | Jan-Mar 2022 (%) | | |
|  | Partial | Fully | Booster | partial | fully | booster |
| 0-17 | 31.5 | 20.8 | 0.2 | 48.4 | 27.2 | 1.5 |
| 18-59 | 87.7 | 77.8 | 8.7 | 89.2 | 80.7 | 33.0 |
| 60+ | 88.2 | 87.3 | 52.4 | 88.4 | 87.6 | 64.1 |

Table S2: Number of hospitalization and death from Oct to Dec 2021 stratified into three age groups

| Vaccine | Age | hospitalized | | | | | Dead | | | | |
| --- | --- | --- | --- | --- | --- | --- | --- | --- | --- | --- | --- |
| partially vaccinated | fully vaccinated | | | booster | partially vaccinated | fully vaccinated | | | booster |
| > 180 days | < 180 days | < 120 days | > 180 days | < 180 days | < 120 days |
| CoronaVac | 0 - 17 | 3 | 1 | 9 | 8 | 0 | 1 | 0 | 0 | 0 | 0 |
| 18 - 59 | 215 | 335 | 617 | 387 | 7 | 39 | 39 | 87 | 53 | 0 |
| Over 60 | 202 | 357 | 2075 | 861 | 25 | 91 | 156 | 789 | 289 | 13 |
| AZD1222 | 0 - 17 |  | 1 | 9 | 8 | 0 | 1 | 0 | 0 | 0 | 0 |
| 18 - 59 | 378 | 55 | 1498 | 1201 | 7 | 67 | 1 | 318 | 254 | 0 |
| Over 60 | 285 | 3407 | 1926 | 105 | 110 | 132 | 1544 | 747 | 46 | 60 |
| BNT162b2 | 0 - 17 | 46 | 3 | 14 | 13 | 0 | 3 | 0 | 1 | 1 | 0 |
| 18 - 59 | 330 | 56 | 361 | 319 | 1 | 64 | 6 | 63 | 57 | 1 |
| Over 60 | 63 | 371 | 87 | 51 | 4 | 31 | 134 | 36 | 23 | 2 |
| Ad26.COV2.S | 0 - 17 | 0 | 0 | 1 | 1 | 0 | 0 | 0 | 0 | 0 | 0 |
| 18 - 59 | 208 | 11 | 4 | 4 | 0 | 51 | 0 | 1 | 1 | 0 |
| Over 60 | 15 | 4 | 6 | 5 | 0 | 5 | 2 | 3 | 3 | 0 |
| Missing manufacturer information | 0 - 17 | 7 | 0 | 0 | 0 | 0 | 3 | 0 | 0 | 0 | 0 |
| 18 - 59 | 23 | 5 | 42 | 22 | 2 | 4 | 0 | 6 | 0 | 1 |
| Over 60 | 13 | 51 | 37 | 13 | 5 | 7 | 17 | 11 | 5 | 1 |

Table S3: Number of hospitalization and death from Jan to Mar 2022 stratified into three age groups

| Vaccine | Age | hospitalized | | | | | Dead | | | | |
| --- | --- | --- | --- | --- | --- | --- | --- | --- | --- | --- | --- |
| partially vaccinated | fully vaccinated | | | booster | partially vaccinated | fully vaccinated | | | booster |
| > 180 days | < 180 days | < 120 days | > 180 days | < 180 days | < 120 days |
| CoronaVac | 0 - 17 | 3 | 7 | 13 | 9 | 6 | 0 | 1 | 0 | 0 | 0 |
| 18 - 59 | 563 | 696 | 4536 | 1153 | 304 | 174 | 184 | 1115 | 230 | 81 |
| Over 60 | 639 | 5632 | 2219 | 313 | 1387 | 344 | 2659 | 846 | 140 | 645 |
| AZD1222 | 0 - 17 | 28 | 15 | 5 | 3 | 2 | 2 | 0 | 0 | 0 | 0 |
| 18 - 59 | 350 | 760 | 1376 | 526 | 159 | 81 | 150 | 210 | 85 | 26 |
| Over 60 | 765 | 14693 | 633 | 376 | 4447 | 391 | 7172 | 304 | 172 | 2147 |
| BNT162b2 | 0 - 17 | 120 | 17 | 135 | 128 | 2 | 20 | 4 | 8 | 7 | 0 |
| 18 - 59 | 526 | 144 | 1771 | 1042 | 95 | 112 | 19 | 289 | 136 | 27 |
| Over 60 | 180 | 1271 | 336 | 189 | 36 | 82 | 488 | 124 | 78 | 15 |
| Ad26.COV2.S | 0 - 17 | 0 | 4 | 5 | 2 | 0 | 0 | 1 | 0 | 0 | 0 |
| 18 - 59 | 209 | 10 | 45 | 38 | 12 | 33 | 3 | 7 | 5 | 2 |
| Over 60 | 36 | 19 | 29 | 9 | 2 | 15 | 9 | 13 | 4 | 1 |
| Missing manufacturer information | 0 - 17 | 7 | 1 | 8 | 7 | 4 | 0 | 0 | 1 | 1 | 0 |
| 18 - 59 | 57 | 59 | 195 | 80 | 12 | 8 | 10 | 34 | 12 | 2 |
| Over 60 | 76 | 566 | 116 | 49 | 35 | 37 | 257 | 47 | 18 | 18 |

Table S4: Death of unvaccinated people (only hospitalized people analyzed)

| Age | Jan 2021 | | Oct - Dec 2021 | | Jan - Mar 2022 | |
| --- | --- | --- | --- | --- | --- | --- |
|  | Death (%) | 95% CI | Death (%) | 95% CI | Death (%) | 95% CI |
| 0-17 | 7.70 | 6.25 - 9.16 | 7.29 | 4.62 - 7.36 | 5.74 | 5.56 - 9.83 |
| 18-59 | 19.43 | 19.03 - 19.84 | 22.34 | 19.16 - 21.10 | 22.09 | 18.73 - 22.87 |
| 60+ | 45.08 | 44.63 - 45.52 | 47.65 | 43.23 - 45.71 | 45.23 | 45.08 - 49.31 |
